# Supplementary material for: Highly efficient electroplating of (220)-oriented nano-twinned copper in methanesulfonic copper baths
Source: Royal Society of Chemistry journal article supplement (doi:10.1039/d4mh00680a), 2024-12-18
Supplement: d4mh00680a1.pdf [file d4mh00680a1.pdf]

## Supporting Information

### Highly Efficient Electroplating of (220)-oriented Nano-twinned Copper in the Methanesulfonic Copper Baths

Hsiang-Sheng Wei, Hsu Tsou, Hao-Yu Ku, Chi-Yu Lai, Shih-Hua Chen, Chun-Cheng Lin, Shang-Tzu Liu, Hung-Yi Huang, Ming-Kun Lu, Kuan-Ling Liu, Chi-Chang Hu\*

Department of Chemical Engineering  
National Tsing Hua University  
101, Section 2, Kuang-Fu Road  
Hsin-Chu, 300044, Taiwan

\*Corresponding author, e-mail: [cchu@che.nthu.edu.tw](mailto:cchu@che.nthu.edu.tw)

## Supplementary Figures

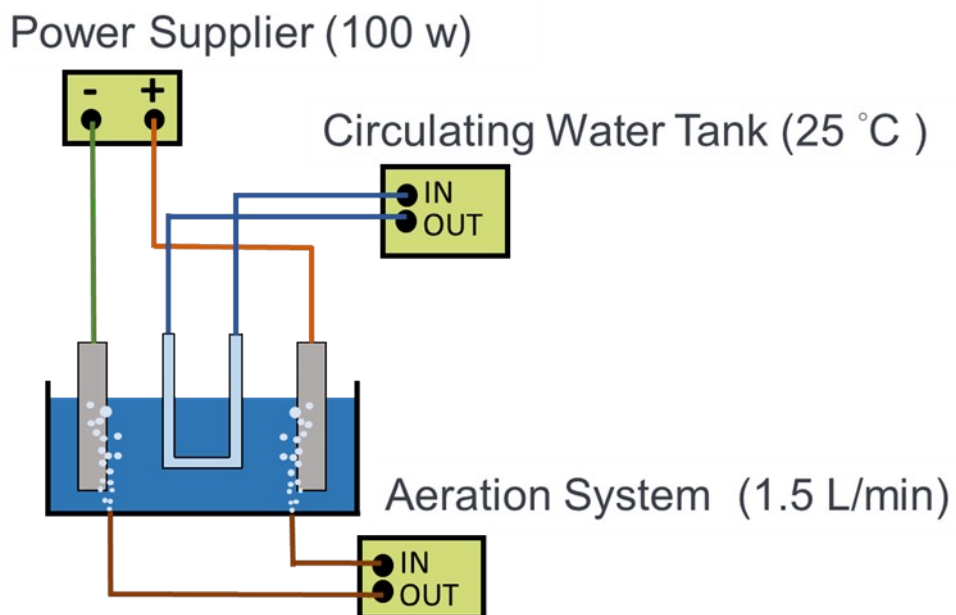

Figure S1. Schematic diagram of methanesulfonic copper baths for electroplating of (220)-oriented nano-twinned copper foil

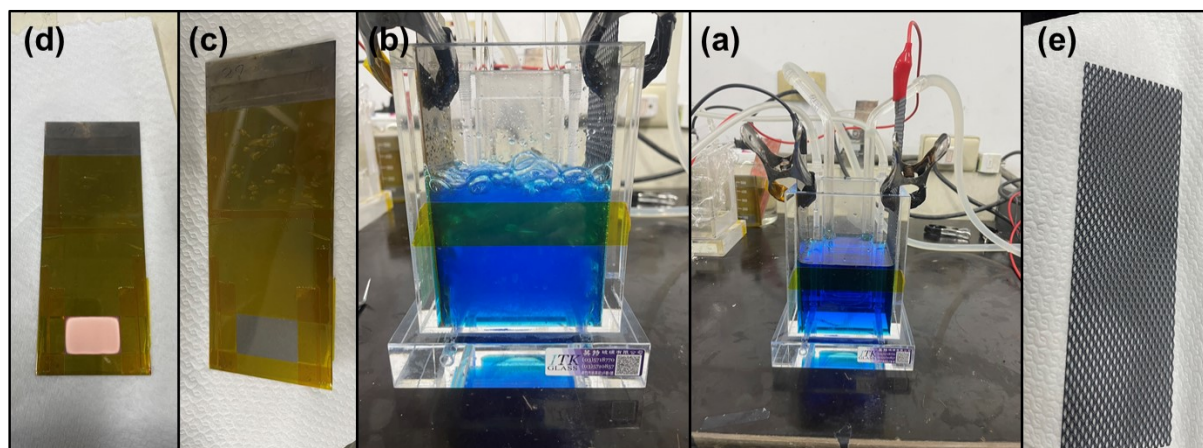

Figure S2. (a) Methanesulfonic copper baths before electroplating (b) Methanesulfonic copper baths during electroplating (c) The titanium plate with well-polished (d) The titanium plate after electroplating (e) The dimensionally stable anode (DSA<sup>®</sup>)

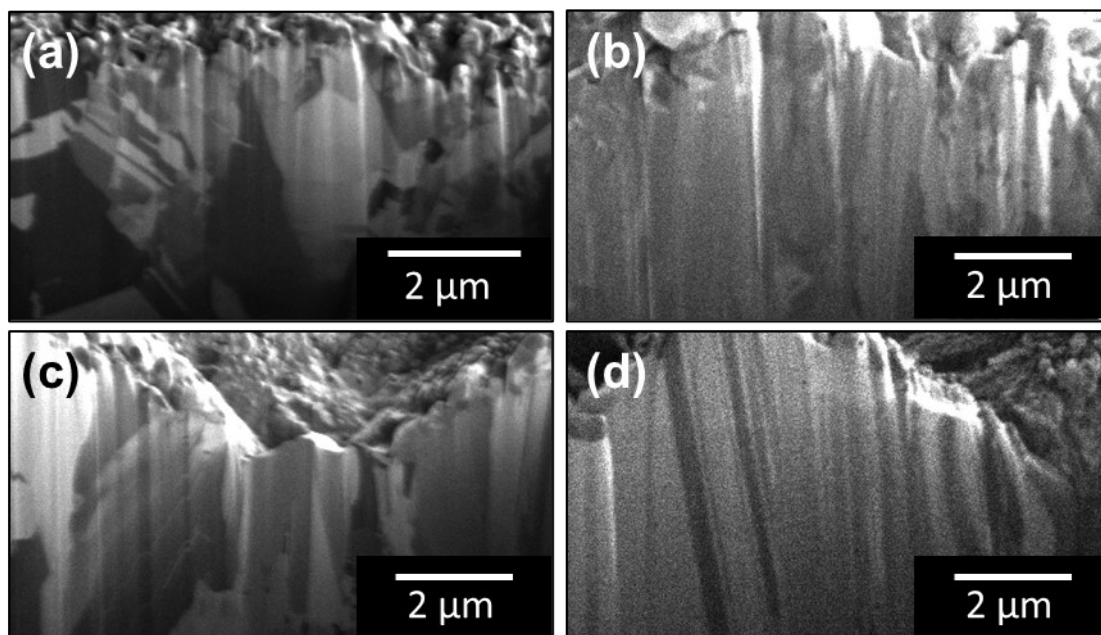

Figure S3. The ion-channeling images of the cross-section microstructure after the FIB milling for the Cu foils plated from methanesulfonic copper baths consisted of 0.86 M copper methanesulfonate ( $\text{Cu}(\text{CH}_3\text{SO}_3)_2$ ) and 1.04 M methane-sulfonic acid ( $\text{CH}_3\text{SO}_3\text{H}$ ) (a) without  $\text{Cl}^-$  (b) 5 ppm, (c) 40 ppm, and (d) 120 ppm  $\text{Cl}^-$

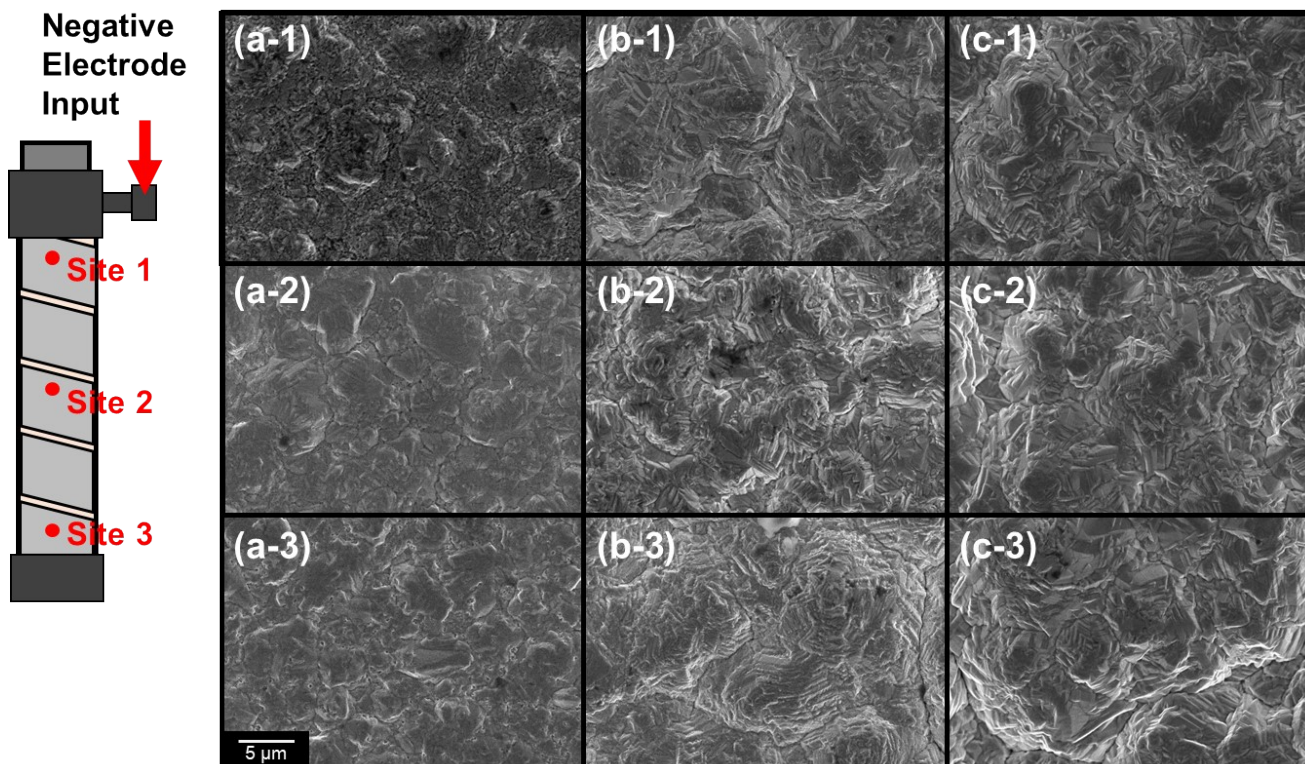

Figure S4. The SEM images of the Cu foils plated from methanesulfonic copper baths consisted of 0.86 M copper methanesulfonate ( $\text{Cu}(\text{CH}_3\text{SO}_3)_2$ ) and 1.04 M methane-sulfonic acid ( $\text{CH}_3\text{SO}_3\text{H}$ ) (a) without  $\text{Cl}^-$  (b) 5 ppm, (c) 40 ppm in in-situ residual stress testing
